# Supplementary material
Source: PubMed Central journal article supplement (PMC3487122)
Supplement: mmc1.pdf [file mmc1.pdf]

## Supplemental Data

### Loss-of-Function Mutations in *HOXC13*

#### Cause Pure Hair and Nail Ectodermal Dysplasia

Zhimiao Lin, Quan Chen, Lei Shi, Mingyang Lee, Kathrin A. Giehl, Zhanli Tang, Huijun Wang, Jie Zhang, Jinghua Yin, Lingshen Wu, Ruo Xiao, Xuanzhu Liu, Lanlan Dai, Xuejun Zhu, Ruoyu Li, Regina C. Betz, Xue Zhang, and Yong Yang

```
GLI1-Human          TDSGVEMTGNAGGSTEDLSSLDEGP
GLI1-Chimp          TDSGVEMTGNAGGSTEDLSSLDEGP
GLI1-Mouse          TDSGVEMAGNAGGSTEDLSSLDEGP
GLI1-Rhesus         TDSGVEMAGNAGGSTEDLSSLDEGP
GLI1-Cat            TDSGVEMTGNAGGSTEDLSSLDEGP
GLI1-Tasmanian devil TDSGVDMAGTLGGSTEDLSSLDEGP
```

**Figure S1. Multiple Alignment of the Region Containing Substitution Site Asn470 of GLI1 in Different Mammalian Species**

Note that Asn470 is not conserved in Tasmanian devil (black highlighted).

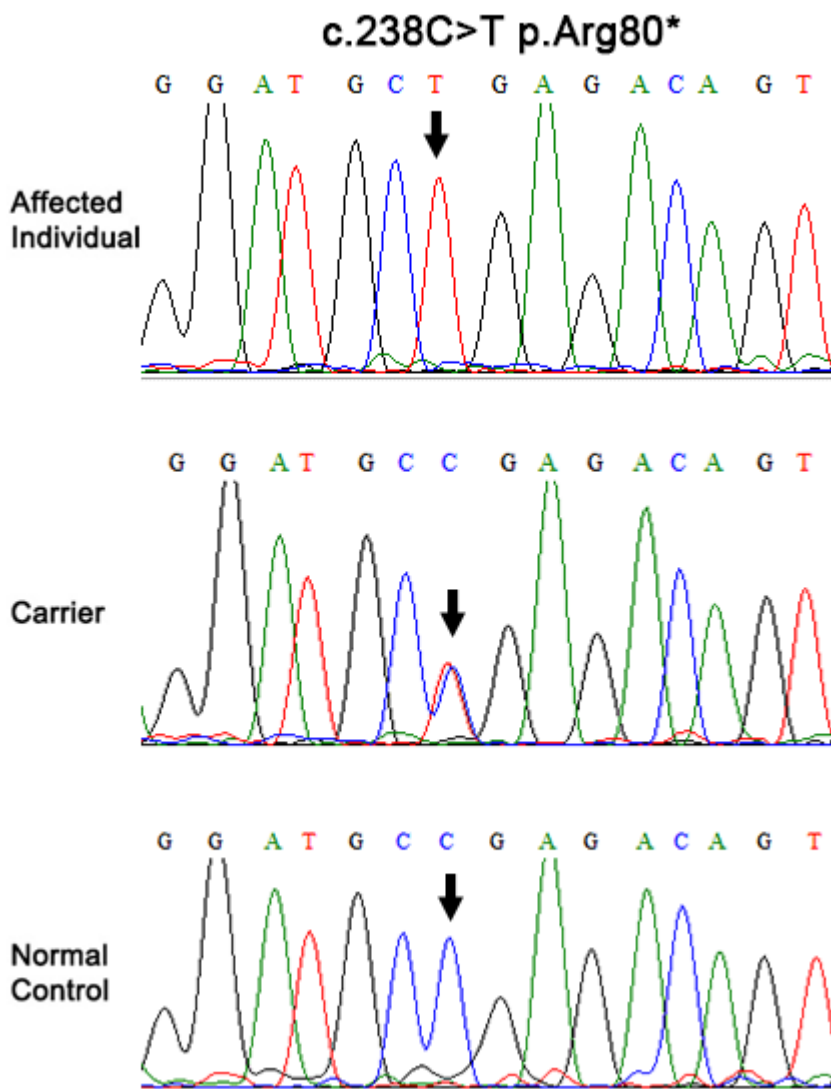

**Figure S2. The Nonsense Mutation in the *AMHR2* Gene in the Chinese Family Causing Persistent Müllerian Duct Syndrome**

Sequence chromatograms show the c.238C>A mutation (p.Arg80\*) in individual V2 (top panel) in a homozygous state and in his father in a heterozygous state (middle panel). This homozygous mutation is also found in individuals IV10 and V3, the latter of whom has no symptoms of persistent Müllerian duct syndrome.

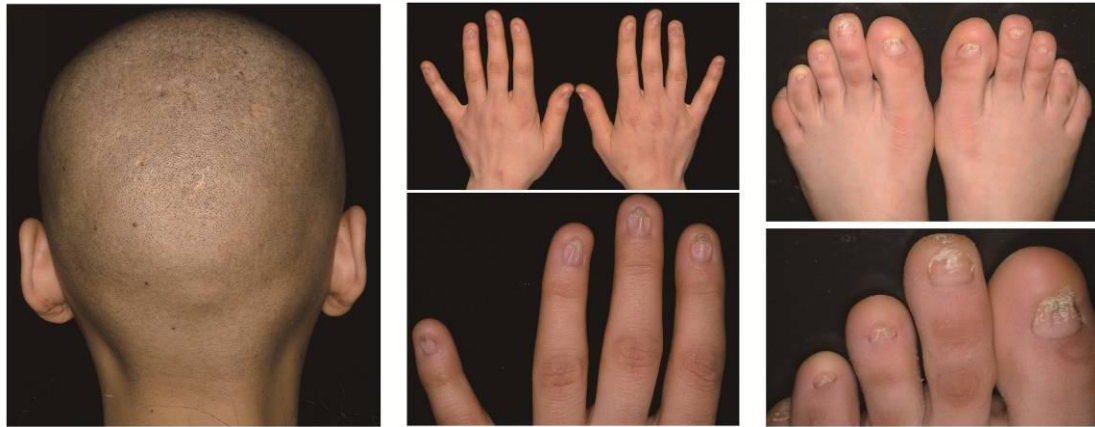

**Figure S3. An Afghan female with hypotrichosis (left) and nail dystrophy (middle and right)**

**Table S1. Summary of Exome Sequencing and the Filtration Procedure**

| <b>Individual</b>                        | <b>IV5</b>                                                                                                                                                                | <b>IV6</b> | <b>V2</b>                           | <b>V3</b>                     |
|------------------------------------------|---------------------------------------------------------------------------------------------------------------------------------------------------------------------------|------------|-------------------------------------|-------------------------------|
| Raw data yield (Mb)                      | 4077                                                                                                                                                                      | 4307       | 4566                                | 3687                          |
| Data mapped to target region (Mb)        | 4444.01                                                                                                                                                                   | 4701.69    | 5121.41                             | 3724.07                       |
| Mean depth of target region              | 100.47                                                                                                                                                                    | 106.54     | 115.78                              | 84.39                         |
| Coverage of target region (%)            | 99.21                                                                                                                                                                     | 99.31      | 99.28                               | 99.26                         |
| Fraction of target covered $\geq 10X$    | 96.42                                                                                                                                                                     | 96.76      | 96.57                               | 96.04                         |
| Capture specificity (%)                  | 75.16                                                                                                                                                                     | 75.41      | 76.59                               | 69.35                         |
| Read coverage of CCDS <sup>a</sup> exons | 264782                                                                                                                                                                    | 264096     | 264850                              | 264268                        |
| Read coverage of CCDS genes              | 18378                                                                                                                                                                     | 18334      | 18375                               | 18343                         |
| Total number of variants                 | 104552                                                                                                                                                                    | 104517     | 102337                              | 98900                         |
| Variants in exons                        | 26391                                                                                                                                                                     | 26289      | 26010                               | 25676                         |
| <b>SNVs data filtration</b>              | <b>Filtration methods</b>                                                                                                                                                 |            | <b>Variants number for V2</b>       | <b>Variants number for V3</b> |
| Step 1                                   | Homozygous variants that is heterozygous in individual IV5 and IV6 and not in the 1000 Genomes Project, the dbSNP134, HapMap databases, YH database, BGI inner databases. |            | 45                                  | 35                            |
| Step 2                                   | Step 1 data in both individual V2 and V3                                                                                                                                  |            | 8                                   |                               |
| Step 3                                   | Step 2 data predicted not tolerated by SIFT software                                                                                                                      |            | 5                                   |                               |
| Step 4                                   | Step 3 data expressed in skin                                                                                                                                             |            | 3                                   |                               |
| Step 5                                   | Step 4 data excluded from 200 normal controls                                                                                                                             |            | 2 ( <i>HOXC13</i> and <i>GLI1</i> ) |                               |

<sup>a</sup>Consensus coding sequence

**Table S2. Primer Pairs for *HOXC13* Sequencing**

|        | <b>Forward Primers (5'-3')</b> | <b>Reverse Primers (5'-3')</b> | <b>Annealing Temperature (°C)</b> | <b>Amplicon Size (bp)</b> |
|--------|--------------------------------|--------------------------------|-----------------------------------|---------------------------|
| Exon-1 | GAAACAGGAGCGAGGTGTCT           | AACGTGTCCGAGCAGATTTC           | 62                                | 1000                      |
| Exon-2 | AGCCTCGGGTCCTCTATCTC           | CTTCCGTGGGTTCCGGTTAT           | 61                                | 394                       |

**Table S3. Primers Used in Deletion Analysis**

| <b>Amplicon</b> | <b>Position</b>             | <b>Forward Primer (5'-3')</b> | <b>Reverse Primer (5'-3')</b> | <b>Size (bp)</b> |
|-----------------|-----------------------------|-------------------------------|-------------------------------|------------------|
| 1               | chr12:54300777<br>-54301505 | GGAGCAGAACAGAAACAGTGGAC       | CAGGTTCCGTCTGTCTGGTCTT        | 728              |
| 2               | chr12:54306337<br>-54306799 | CAGGAGGAGAAGTTTTGGTGGT        | CATTATTGCACTCCAGCTTAGGC       | 462              |
| 3               | chr12:54307568<br>-54308146 | GCTGGCTGTGTAACCTCTCTCAT       | TAAGAGATAATCCGCCAACAGC        | 578              |
| 4               | chr12:54308194<br>-54308812 | TTGAGCCCAGGCATAATTC           | AAATAGCACCAAGAGCAAAACC        | 618              |
| 5               | chr12:54309789<br>-54310865 | GCAGCCGTCACACTATCCAC          | GCAGAGTGAAAAACCCATCAAG        | 1076             |
| 6               | chr12:54317881<br>-54318514 | GACCTGCTACTGAATCCGAAC         | GTGGCACCAGCACTCTCTCAG         | 633              |
| 7               | chr12:54323589<br>-54324506 | ATGTTTGACGGGGAGAGGGTT         | GGCATAGTCACACACGCAATCC        | 917              |
| 8               | chr12:54327928<br>-54328645 | CAAGTTTGGGTTTAAGAGCGG         | ACAAAGAGCCTCACCACCATG         | 717              |
| 9               | chr12:54332362<br>-54332760 | ATCAGCACAGACTTTTTCCCTTCGC     | CCGCGCTGTCTCATAGACGTACAT      | 398              |
| 10              | chr12:54332369<br>-54332874 | CAGACTTTTTCCCTTCGCC           | TGCCAGACCATCCATGCT            | 505              |
| 11              | chr12:54332528<br>-54333611 | TGCGTAGAGGGAATGTAGGG          | CGTGTCGGAGCAGATTCTT           | 1083             |
| 12              | chr12:54333601<br>-54333900 | GCTCCGACAGTTCTCTGTAGCTGC      | TGTCTAGTGCCTGAACGATCCTGGC     | 299              |
| 13              | chr12:54334578<br>-54334857 | AGCCACAGATGTCTCCCGACAGTGC     | TCAGAAGTCAGGGTGCCTAGTGTAGG    | 279              |
| 14              | chr12:54335518<br>-54335815 | CAGCAGCTATGTGCTCCACAATCCC     | ATGCTCCATCTCCCACACCAGCC       | 297              |
| 15              | chr12:54336590<br>-54337360 | CTAAATCAATCCTTGGCATCCT        | GCCTCATTTGACTGTCTTCTGG        | 770              |
| 16              | chr12:54337449<br>-54338176 | GTCCATGAGAGAAAGCAGACCC        | AGATGAGTCTTCAGCCTTTGG         | 727              |
| 17              | chr12:54338726<br>-54339233 | CTCTATCTCAGTCCAGCCGCTTGCC     | AGGCTGGGGATGGGATAGGGAGTTG     | 507              |
| 18              | chr12:54339786<br>-54340159 | AGGACAAAGACTCCAGCCACGCTGC     | ACCAGTGGGAAGGGAAGAGGCAAGG     | 373              |
| C               | chr8:42301935-<br>42302488  | TTTAAGCACATATTCGCCAGA         | CTTCCAGTTACTCATGGCAAC         | 553              |

**Table S4. GLI1 (NM\_005269.2) Primers for PCR Amplification and Sequencing**

| <b>Amplicon</b> | <b>Position</b>             | <b>Forward Primer(5'-3')</b> | <b>Reverse Primer(5'-3')</b> | <b>Size</b> |
|-----------------|-----------------------------|------------------------------|------------------------------|-------------|
| Ex2-3           | chr12:57,857,293-57,858,010 | CGGCTCAGTGATGCTCTTTTC        | ACTTCTTGATGGTCTCTGACG        | 718         |
| Ex4-5           | chr12:57,858,331-57,859,186 | AGATAGCATCAATAGGGCAAAG       | AAGGAGTGAACCCAGCA            | 856         |
| Ex6-8           | chr12:57,859,342-57,860,316 | TTCTGCTTACTTCCACCCTCAT       | GCCAAACACAGTCACACAAACAT      | 975         |
| Ex9             | chr12:57,860,948-57,861,379 | AAGTTCTTGCTGCCCTTGTC         | CTCTGTGGAGTGGGTGCTGG         | 432         |
| Ex10            | chr12:57,861,696-57,862,158 | GTTGTCAACCACTTTTCCCAT        | GCCCAAAGAGCAACACTAAGAC       | 463         |
| Ex11            | chr12:57,863,060-57,863,562 | AGTTTGCTCCCCATCTTTAC         | CCTCAAGGGTGACTTCTCCT         | 503         |
| Ex12-1          | chr12:57,864,060-57,864,873 | GTCCTTGACCATCCTACCTT         | GGAACTCACCCATGTTTCTT         | 814         |
| Ex12-2          | chr12:57,864,362-57,865,262 | TGGTCTCCCATGCCCTCTT          | CCCACCCTCCACAGTAGCT          | 901         |
| Ex12-3          | chr12:57,864,913-57,865,963 | GTGGAACCTACAGCCAGTGTC        | AGCCCATACCTCCCATCCCT         | 1051        |

**Table S5. Primer Pairs for qRT-PCR**

|               | <b>Forward Primers (5'-3')</b> | <b>Reverse Primers (5'-3')</b> |
|---------------|--------------------------------|--------------------------------|
| 18S rRNA      | GTAACCCGTTGAACCCCAT            | CCATCCAATCGGTAGTAGCG           |
| <i>ACTB</i>   | CTGGAACGGTGAAGGTGACA           | AAGGGACTTCCTGTAACAATGCA        |
| <i>HOXC13</i> | GGCTAGCAAGTTCATCACCA           | AGATGAGGCGCTTTCGATTT           |
| <i>FOXN1</i>  | CAAGAGAGAAAAGCTGGGCT           | GTGTGCCCCATAAGTAGGTC           |
| <i>DSG4</i>   | AAATGATGGGAATTGGTTCG           | TGGATGAAATGCAGGTCCTT           |
| <i>KRT85</i>  | AAAGAAGGACGTGGACTGTG           | CAGGAAGCTAGACTCCTCCA           |
| <i>KRT35</i>  | CTGACCCTGTGCAAGTCTGA           | CTCGGTTCAAGTCAACAGGT           |
